# Supplementary material for: Cyclophilins A, B, and C Role in Human T Lymphocytes Upon Inflammatory Conditions
Source: PubMed Central journal article supplement (PMC8042163; doi:10.3389/fimmu.2021.609196), 2021-03-30
Supplement: DataSheet_1.pdf [file DataSheet_1.pdf]

## Supplementary figure S1

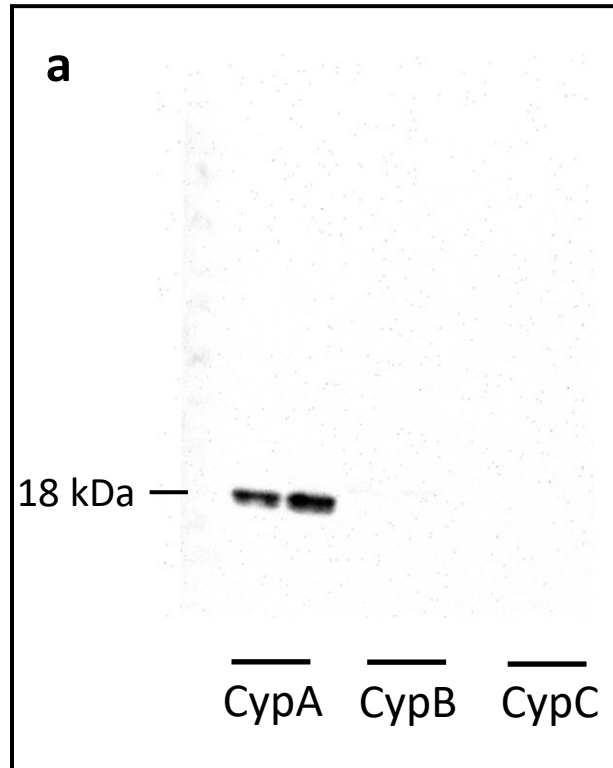

**Figure S1a.** Images of western blot using anti-CypA antibody. The immunoreactive bands were analysed using the Supersignal West Pico.

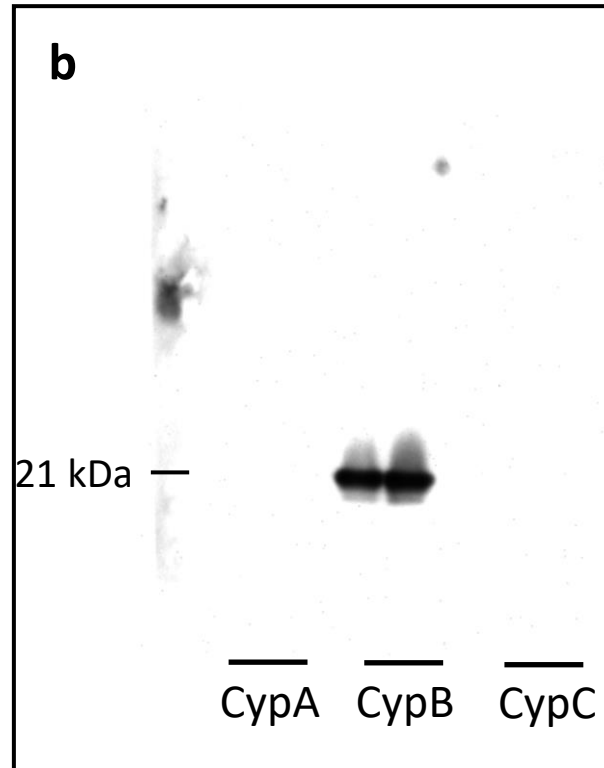

**Figure S1b.** Images of western blot using anti-CypB antibody. The immunoreactive bands were analysed using the Supersignal West Pico.

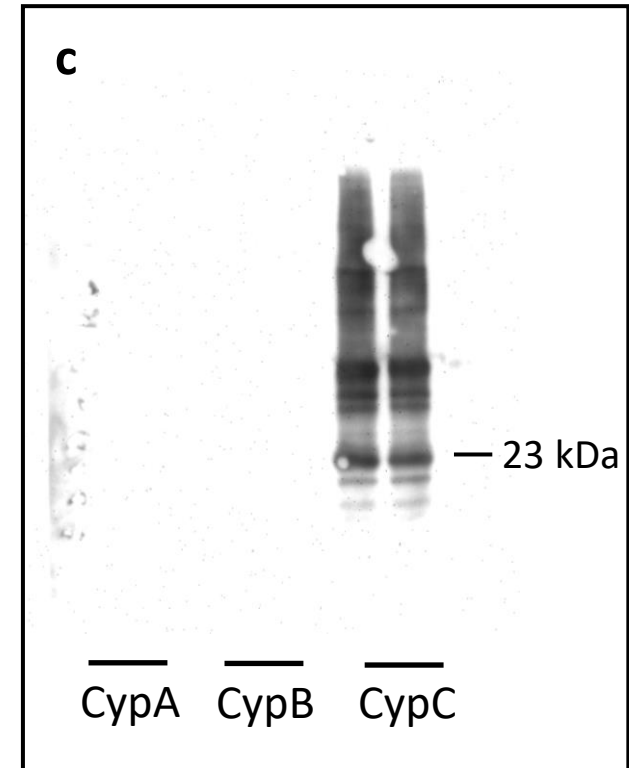

**Figure S1c.** Images of western blot using anti-CypC antibody. The immunoreactive bands were analysed using the Supersignal West Pico.

## Supplementary figure S2

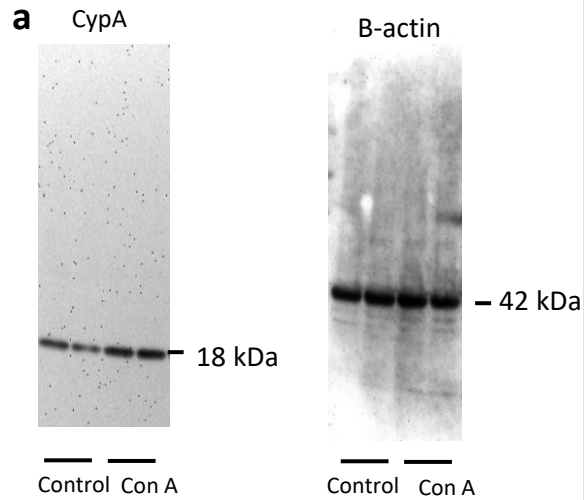

**Figure S2a.** Uncropped images of western blot for CypA used in figure 2d. The immunoreactive bands were analysed using the Supersignal West Pico.

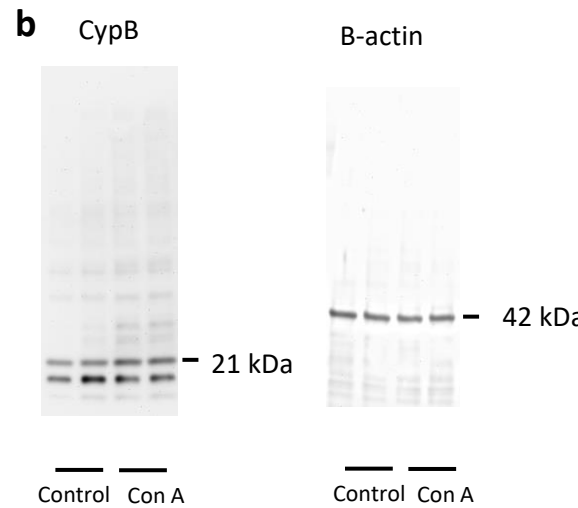

**Figure S2b.** Uncropped images of western blot for CypB used figure 2e. The immunoreactive bands were analysed using the Supersignal West Pico.

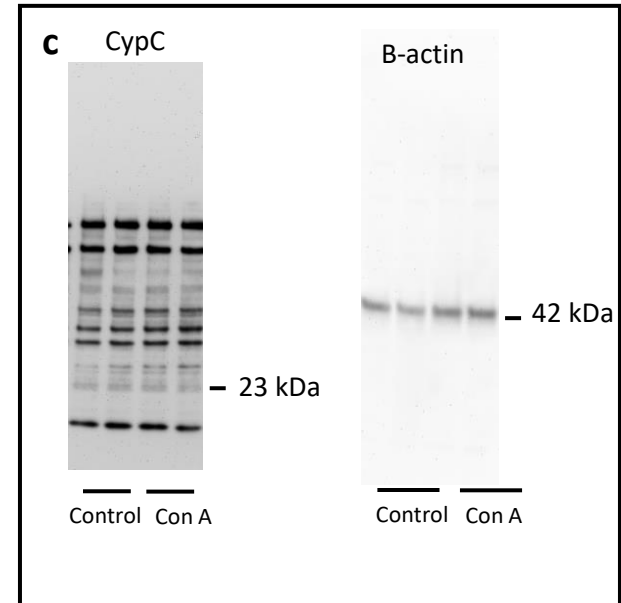

**Figure S2c.** Uncropped images of western blot for CypC used in figure 2f. The immunoreactive bands were analysed using the Supersignal West Femto.

## Supplementary figure S3

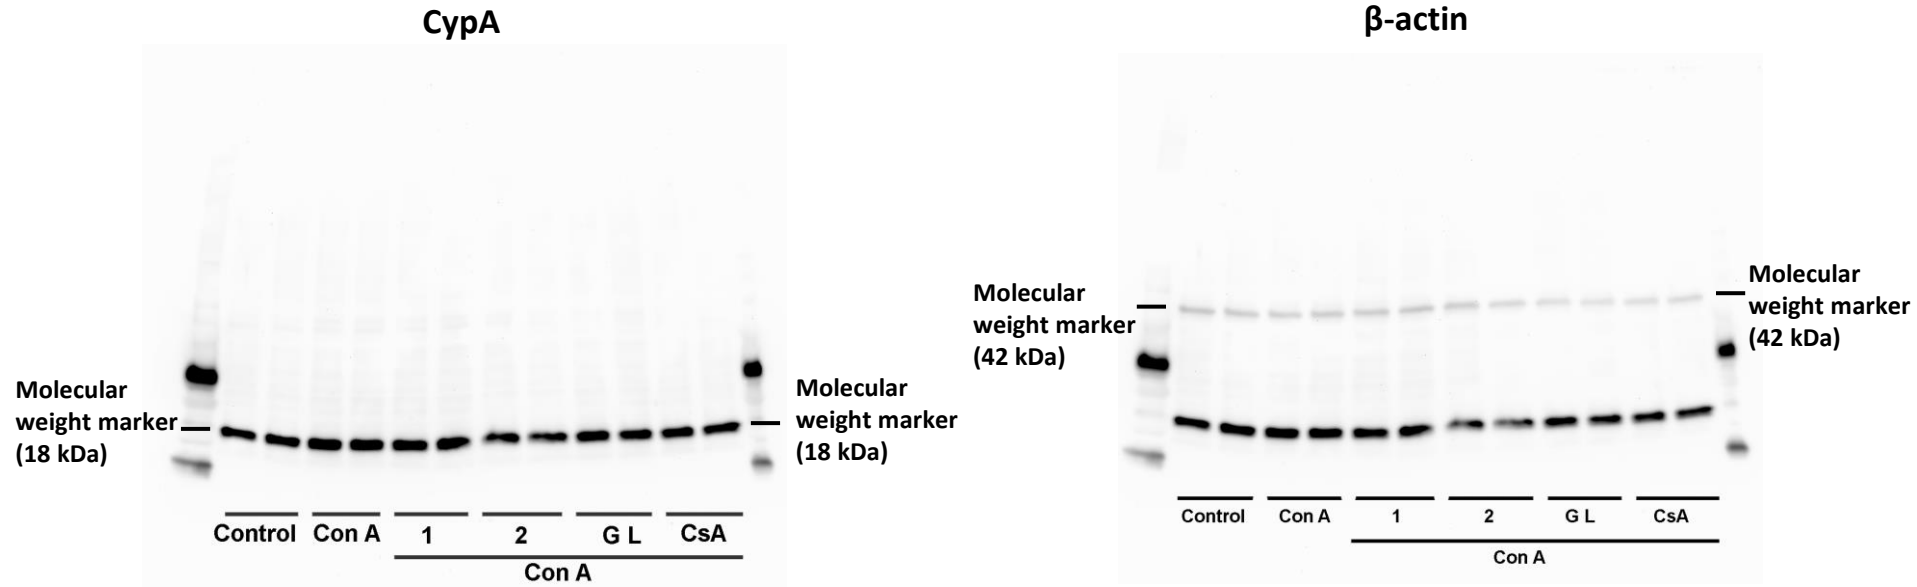

**Figure S3.** Uncropped images of western blot for CypA used in figure 3d. The immunoreactive bands were analysed using the Supersignal West Pico.

## Supplementary figure S4

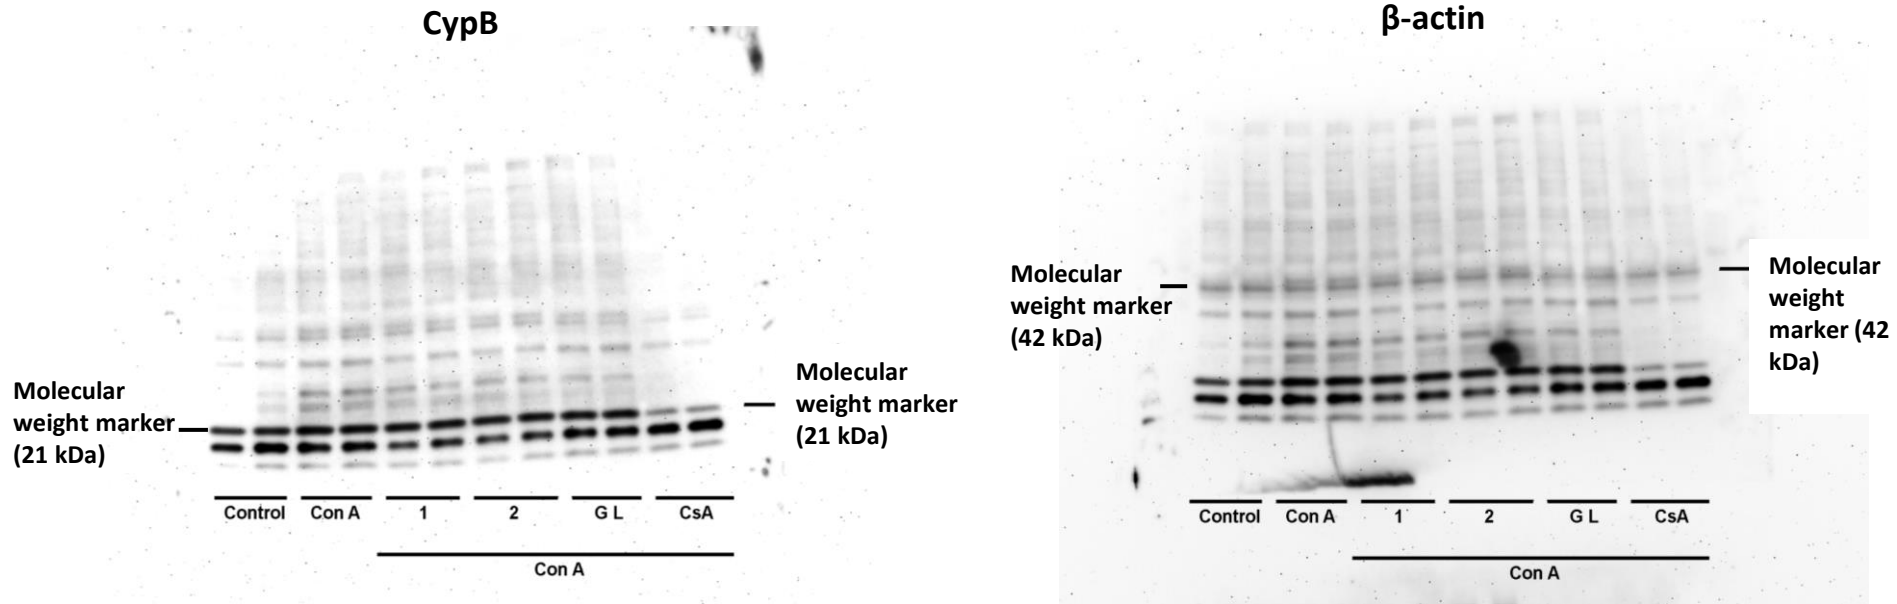

**Figure S4.** Uncropped images of western blot for CypB used in figure 3e. The immunoreactive bands were analysed using the Supersignal West Pico.

## Supplementary figure S5

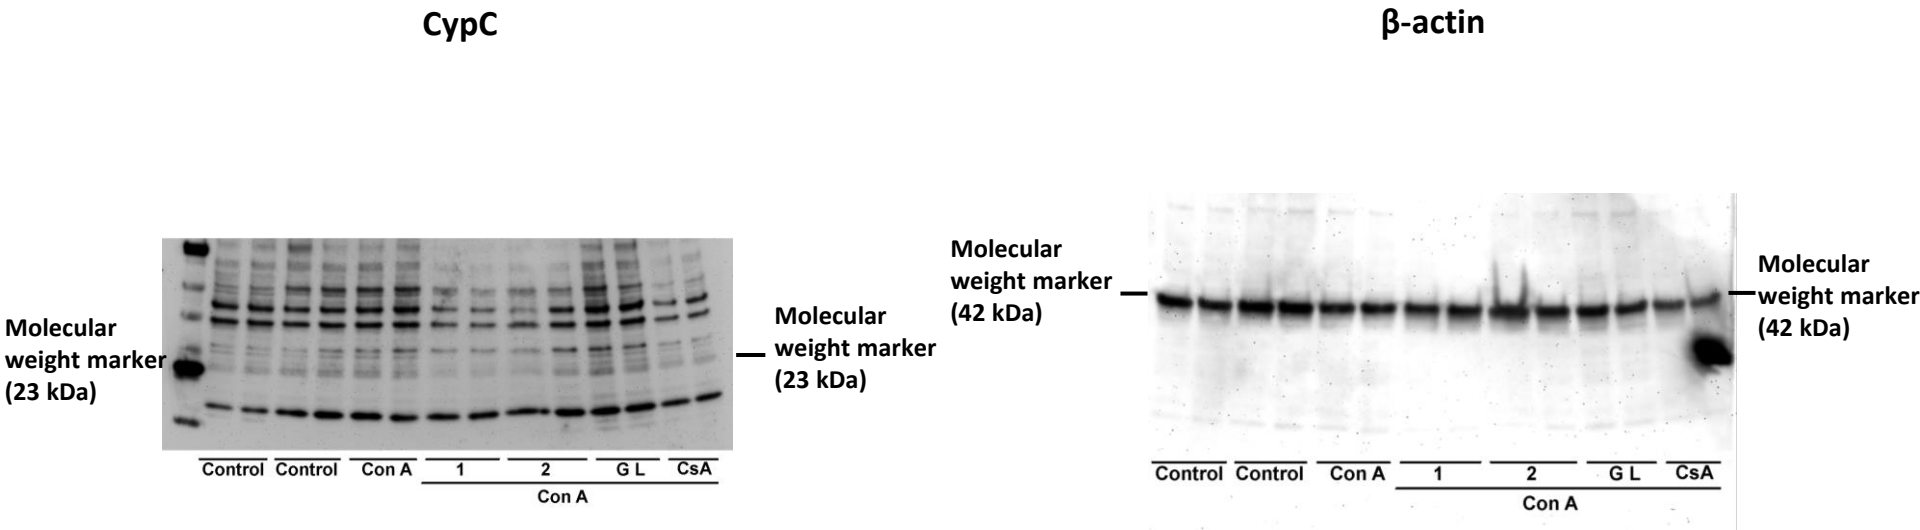

**Figure S5.** Uncropped images of western blot for CypC used in figure 3f. The immunoreactive bands were analysed using the Supersignal West Femto.
